# Supplementary material for: Amyloid positron emission tomography and cerebrospinal fluid results from a crenezumab anti-amyloid-beta antibody double-blind, placebo-controlled, randomized phase II study in mild-to-moderate Alzheimer’s disease (BLAZE)
Source: PubMed Central journal article supplement (PMC6146627; doi:10.1186/s13195-018-0424-5), 2018-09-19
Supplement: 13195_2018_424_MOESM4_ESM.pdf [file 13195_2018_424_MOESM4_ESM.pdf]

**Fig. S3** FDG PET

FDG PET SUVR change from baseline in the low-dose SC (A) and high-dose IV (B) cohorts.

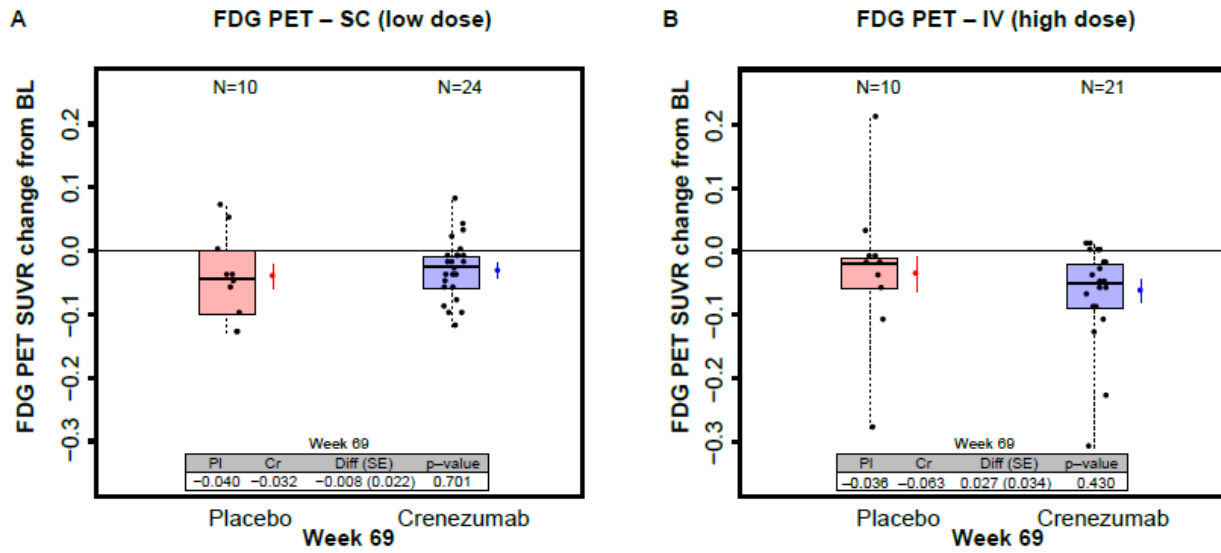

*Cr* crenezumab; *Diff* difference; *FDG* fluorodeoxyglucose ( $^{18}\text{F}$ ); *IV* intravenous; *PET* positron emission tomography; *PI* placebo; *SC* subcutaneous; *SE* standard error
