# Supplementary material for: Amyloid positron emission tomography and cerebrospinal fluid results from a crenezumab anti-amyloid-beta antibody double-blind, placebo-controlled, randomized phase II study in mild-to-moderate Alzheimer’s disease (BLAZE)
Source: PubMed Central journal article supplement (PMC6146627; doi:10.1186/s13195-018-0424-5), 2018-09-19
Supplement: 13195_2018_424_MOESM5_ESM.pdf [file 13195_2018_424_MOESM5_ESM.pdf]

**Table S1** Summary of ARIA events

|                              | Low-dose SC cohort |            | High-dose IV cohort |            | All patients |            |
|------------------------------|--------------------|------------|---------------------|------------|--------------|------------|
|                              | (n = 39)           |            | (n = 52)            |            | (n = 91)     |            |
|                              | Placebo            | Crenezumab | Placebo             | Crenezumab | Placebo      | Crenezumab |
|                              | (n = 13)           | (n = 26)   | (n = 16)            | (n = 36)   | (n = 29)     | (n = 62)   |
| Any ARIA-E, n (%)            |                    |            |                     |            |              |            |
| Symptomatic                  | 0 (0.0)            | 0 (0.0)    | 0 (0.0)             | 0 (0.0)    | 0 (0.0)      | 0 (0.0)    |
| Asymptomatic                 | 0 (0.0)            | 0 (0.0)    | 0 (0.0)             | 0 (0.0)    | 0 (0.0)      | 0 (0.0)    |
| Superficial siderosis, n (%) |                    |            |                     |            |              |            |
|                              | 0 (0.0)            | 0 (0.0)    | 1 (6.3)             | 0 (0.0)    | 1 (3.4)      | 0 (0.0)    |
| Macrohemorrhage, n (%)       |                    |            |                     |            |              |            |
|                              | 0 (0.0)            | 0 (0.0)    | 0 (0.0)             | 0 (0.0)    | 0 (0.0)      | 0 (0.0)    |
| New ARIA-H, n (%)            |                    |            |                     |            |              |            |
| Symptomatic                  | 0 (0.0)            | 0 (0.0)    | 0 (0.0)             | 0 (0.0)    | 0 (0.0)      | 0 (0.0)    |
| Asymptomatic                 | 0 (0.0)            | 4 (15.4)   | 1 (6.3)             | 5 (13.9)   | 1 (3.4)      | 9 (14.5)   |
| 1 microhemorrhage            | 0 (0.0)            | 1 (3.8)    | 0 (0.0)             | 1 (2.8)    | 0 (0.0)      | 2 (3.2)    |
| 2–4 microhemorrhages         | 0 (0.0)            | 2 (7.7)    | 1 (6.3)             | 2 (5.6)    | 1 (3.4)      | 4 (6.5)    |
| >4 microhemorrhages          | 0 (0.0)            | 1 (3.8)    | 0 (0.0)             | 2 (5.6)    | 0 (0.0)      | 3 (4.8)    |

*ARIA-E* amyloid-related imaging abnormalities: vasogenic edema or effusions; *ARIA-H* amyloid-related imaging abnormalities: microhemorrhage and siderosis; *IV* intravenous; *SC* subcutaneous
