# Supplementary material for: Amyloid positron emission tomography and cerebrospinal fluid results from a crenezumab anti-amyloid-beta antibody double-blind, placebo-controlled, randomized phase II study in mild-to-moderate Alzheimer’s disease (BLAZE)
Source: PubMed Central journal article supplement (PMC6146627; doi:10.1186/s13195-018-0424-5), 2018-09-19
Supplement: 13195_2018_424_MOESM6_ESM.pdf [file 13195_2018_424_MOESM6_ESM.pdf]

**Fig. S4** CSF A $\beta$ (1–42) crenezumab correlation analysis

Correlation analysis of change in CSF A $\beta$ (1–42) from baseline and crenezumab concentrations at Week 69 in patients in the low-dose SC cohort (circles) and high-dose cohort (triangles).

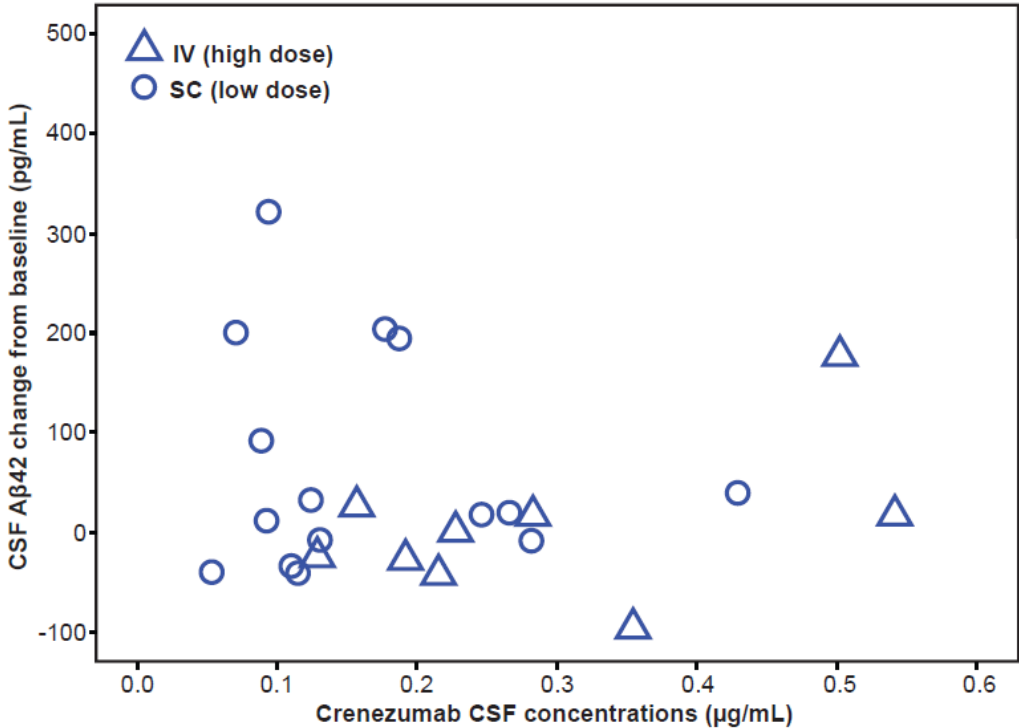

A $\beta$  amyloid-beta; CSF cerebrospinal fluid; IV intravenous; SC subcutaneous
