# Supplementary material for: Amyloid positron emission tomography and cerebrospinal fluid results from a crenezumab anti-amyloid-beta antibody double-blind, placebo-controlled, randomized phase II study in mild-to-moderate Alzheimer’s disease (BLAZE)
Source: PubMed Central journal article supplement (PMC6146627; doi:10.1186/s13195-018-0424-5), 2018-09-19
Supplement: 13195_2018_424_MOESM7_ESM.pdf [file 13195_2018_424_MOESM7_ESM.pdf]

**Fig. S5 CDR-SB**

Change from baseline (BL) of CDR-SB score in patients with mild-to-moderate AD (A and C) or mild AD (B and D) in the low-dose SC (A and B) and high-dose IV (C and D) cohorts.

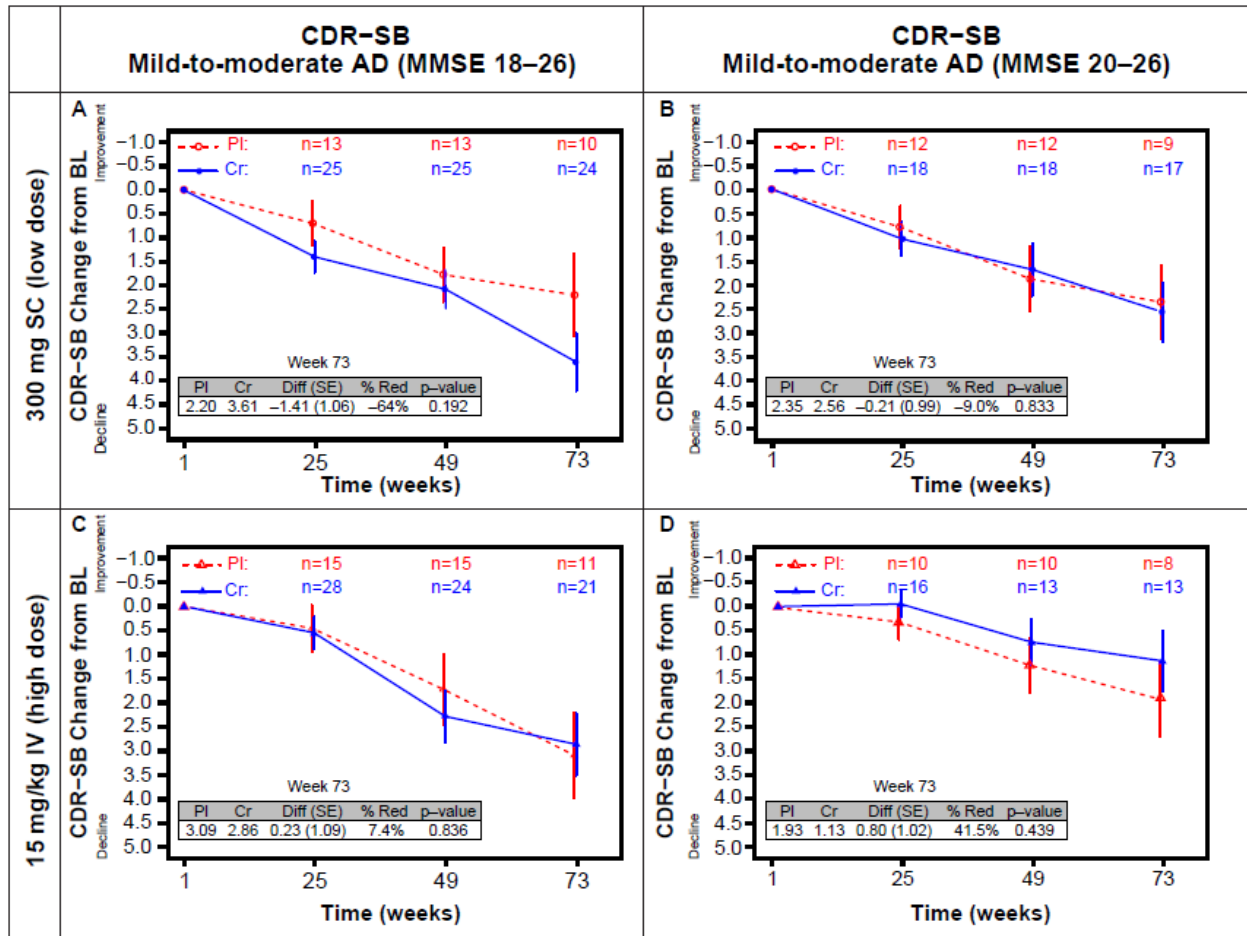

% Red percentage reduction; AD Alzheimer's disease; BL baseline; CDR-SB Clinical Dementia Rating-Sum of Boxes; Cr crenesumab; Diff difference; IV intravenous; MMSE Mini-Mental State Examination; PI placebo; SC subcutaneous; SE standard error
